# Supplementary material for: An open source database for the synthesis of soil radiocarbondata: ISRaD version 1.0
Source: Copernicus journal article supplement (doi:10.5194/essd-2019-55), 2019-05-09
Supplement: Supplementary file [file essd-2019-55-RC3-supplement.pdf]

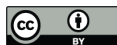

## An open source database for the synthesis of soil radiocarbon data: ISRaD version 1.0

Corey R. Lawrence<sup>1\*#</sup>, Jeffrey Beem-Miller<sup>2#</sup>, Alison M. Hoyt<sup>2,3#</sup>, Grey Monroe<sup>4#</sup>, Carlos A. Sierra<sup>2#</sup>,  
Shane Stoner<sup>2</sup>, Katherine Heckman<sup>5#</sup>, Joseph C. Blankinship<sup>6#</sup>, Susan E. Crow<sup>7#</sup>, Gavin McNicol<sup>8</sup>, Susan  
Trumbore<sup>2#</sup>, Paul A. Levine<sup>9</sup>, Olga Vinduškova<sup>8</sup>, Katherine Todd-Brown<sup>10</sup>, Craig Rasmussen<sup>6#</sup>, Caitlin E.  
Hicks Pries<sup>11#</sup>, Christina Schädel<sup>12#</sup>, Karis McFarlane<sup>13</sup>, Sebastian Doetterl<sup>14</sup>, Christine Hatté<sup>15</sup>, Yujie He<sup>9</sup>,  
Claire Treat<sup>16</sup>, Jennifer W. Harden<sup>7,17</sup>, Margaret S. Torn<sup>3</sup>, Cristian Estop-Aragónés<sup>18</sup>, Asmeret Asefaw  
Berhe<sup>19#</sup>, Marco Keiluweit<sup>20#</sup>, Erika Marin-Spiotta<sup>21#</sup>, Alain F. Plante<sup>22#</sup>, Aaron Thomson<sup>23#</sup>, Joshua P.  
Schimmel<sup>24#</sup>, Lydia J. S. Vaughn<sup>3,25</sup>, Rota Wagai<sup>26#</sup>

<sup>1</sup>US Geological Survey, Geoscience & Environmental Change Science Center, Denver, CO, USA

<sup>2</sup>Max Planck Institute for Biogeochemistry, Jena, Germany

<sup>3</sup>Climate and Ecosystem Sciences Division, Lawrence Berkeley National Laboratory, Berkeley, CA, USA

<sup>4</sup>Graduate Degree Program in Ecology, Colorado State University, Fort Collins, CO, USA

<sup>5</sup>US Forest Service Northern Research Station, Houghton, MI, USA

<sup>6</sup>Department of Soil, Water, and Environmental Science, University of Arizona, Tucson, AZ, USA

<sup>7</sup>University of Hawaii Manoa, Honolulu, HI, USA

<sup>8</sup>Department of Earth System Science, Stanford University, Stanford, CA, USA

<sup>9</sup>Department of Earth System Science, University of California, Irvine, CA, USA

<sup>10</sup>Wilfred Laurier University, Waterloo, Ontario, Canada

<sup>11</sup>Department of Biological Sciences, Dartmouth College, Hanover, NH, USA

<sup>12</sup>Center for Ecosystem Science and Society, Northern Arizona University, Flagstaff, AZ, USA

<sup>13</sup>Lawrence Livermore National Laboratory, Livermore, CA, USA

<sup>14</sup>Department of Environmental Systems Science, ETH, Zurich, Switzerland

<sup>15</sup>LSCE, UMR 8212 CEA-CNRS-UVSQ, Université Paris Saclay, F- 91191 Gif-sur-Yvette, France

<sup>16</sup>University of Eastern Finland, Joensuu, Finland

<sup>17</sup>US Geological Survey, Menlo Park, CA, USA

<sup>18</sup>Department of Renewable Resources, University of Alberta, Edmonton, Alberta, Canada

<sup>19</sup>Department of Life and Environmental Sciences, University of California, Merced, CA, USA

<sup>20</sup>Stockbridge School of Agriculture, University of Massachusetts-Amherst, Amherst, MA, USA

<sup>21</sup>Department of Geography, University of Wisconsin - Madison, Madison, WI, USA

<sup>22</sup>Department of Earth and Environmental Science, University of Pennsylvania, Philadelphia, PA, USA

<sup>23</sup>Department of Crop and Soil Science & Odum School of Ecology, University of Georgia, Athens, GA, USA

<sup>24</sup>Department of Ecology, Evolution, and Marine Biology, University of California, Santa Barbara, CA, USA

<sup>25</sup>Department of Integrative Biology, University of California, Berkeley, CA, USA

<sup>26</sup>National Agriculture and Food Research Organization, Institute for Agro-Environmental Sciences, Tsukuba, Ibaraki, Japan

\*Corresponding Author ([clawrence@usgs.gov](mailto:clawrence@usgs.gov)), #USGS Powell Center working group participant

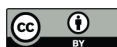

**Abstract.** Radiocarbon is a critical constraint on our estimates of the timescales of soil carbon cycling that can aid in identifying mechanisms of carbon stabilization and destabilization, and improve forecast of soil carbon response to management or environmental change. Despite the wealth of soil radiocarbon data that has been reported over the past 75 years, the ability to apply these data to global scale questions is limited by our capacity to synthesis and compare measurements generated using a variety of methods. Here we describe the International Soil Radiocarbon Database (ISRaD, [soilradiocarbon.org](http://soilradiocarbon.org)), an open-source archive of soils data that include data from bulk soils, or “whole-soils”; distinct soil carbon pools isolated in the laboratory by a variety of soil fractionation methods; samples of soil gas or water collected interstitially from within an intact soil profile; CO<sub>2</sub> gas isolated from laboratory soil incubations; and samples collected *in situ* from a soil surface. The core of ISRaD is a relational database structured around individual datasets (entries) and organized hierarchically to report soil radiocarbon data, measured at different physical and temporal scales, as well as other soil or environmental properties that may also be measured at one or more levels of the hierarchy that may assist with interpretation and context. Anyone may contribute their own data to the database by entering it into the ISRaD template and subjecting it to quality assurance protocols. ISRaD can be accessed through: (1) a web-based interface, (2) an R package (ISRaD), or (3) direct access to code and data through the GitHub repository, which hosts both code and data. The design of ISRaD allows for participants to become directly involved in the management, design, and application of ISRaD data. The synthesized dataset is available in two forms: the original data as reported by the authors of the datasets; and an enhanced dataset that includes ancillary geospatial data calculated within the ISRaD framework. ISRaD also provides data management tools in the ISRaD-R package that provide a starting point for data analysis. This community-based dataset and platform for soil radiocarbon and a wide array of additional soils data information in soils where data are easy to contribute and the community is invited to add tools and ideas for improvement. As a whole, ISRaD provides resources that can aid our evaluation of soil dynamics and improve our understanding of controls on soil carbon dynamics across a range of spatial and temporal scales. The ISRaD v1.0 dataset (Lawrence et al., 2019) is archived and freely available at <https://doi.org/10.5281/zenodo.2613911>.

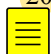



## 1 Introduction

2 The study of soil organic matter (SOM) dynamics is essential to an improved understanding of the  
3 Earth's carbon cycle. Current evaluations suggest that SOM accounts for up to 2770 Pg of organic  
4 carbon in the top 3 m of soil (Jackson et al., 2017; Le Quéré et al., 2018), which makes it one of  
5 the largest actively cycling terrestrial carbon reservoir and an important modulator of climate  
6 change (Sulman et al., 2018). However, the lack of clarity about which fraction of that reservoir  
7 will respond to ongoing environmental changes (i.e. timescales of years to centuries) and which  
8 will respond only on millennial timescales (He et al. 2016) makes it imperative to improve our  
9 understanding of the controls on soil carbon cycling. Additionally, many studies and models focus  
10 on only the top 0.5 m of soil or less, despite deeper soils contributing a significant proportion of  
11 SOM storage (Rumpel and Kögel-Knabner, 2010). There is an urgent need to synthesize a wide  
12 variety of soils data to model the role of soil in the climate system (Bradford et al., 2016), to  
13 develop more data driven estimates of soil health (Harden et al., 2017), and to extend our detailed  
14 understanding of soil developed from observations made at the profile scale to both regional and  
15 global extents. Here we describe a new open-source database for the synthesis of soils data with a  
16 particular focus on soil radiocarbon data.

17

18 Radiocarbon (i.e.,  $^{14}\text{C}$ ) content of SOM is a useful estimate of the timescales of SOM cycling  
19 including the turnover time, residence time, or mean age of carbon in soil - defined as the time it  
20 has been isolated in soil from the atmosphere (Sierra et al., 2017; Manzoni et al., 2009; Trumbore,  
21 2006). Although it was recognized very early on that radiocarbon measurements could provide a  
22 useful measure of the stability of soil carbon (Tam and Ostlund, 1960), the need for several grams  
23 of carbon for decay-counting methods meant that there were relatively few publications before the  
24 mid-1980's. Many of these papers only published bulk soil radiocarbon for the same reason (with  
25 some exceptions, e.g., Martel and Paul, 1974; Goh et al. 1977). These early papers indicated that  
26 carbon in soils is heterogeneous and made up of a range of different aged materials that could be  
27 separated chemically (Martel and Paul, 1974). Several of these papers use models and the uptake  
28 of bomb carbon (Goh et al. 1977, Cherinski 1981, O'Brien, 1984; Balesdent, 1987). The advent  
29 of accelerator mass spectrometry in the 1980's allowed for radiocarbon analysis using milligrams  
30 of carbon instead of grams, while simultaneously increasing sample throughput. This development

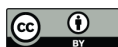

31 enabled analysis of small amounts of archived soils to track the incorporation of  $^{14}\text{C}$  derived from  
32 atmospheric testing of nuclear weapons, as well as making it far easier to analyze physically and  
33 chemically isolated soil fractions (e.g., Trumbore 1993). These applications have led to an  
34 explosion in the number of publications with radiocarbon measurements from soil. This database  
35 is an attempt to provide an archive for all the previously published data but also a repository for  
36 organizing new data as it is published.

37

38 Two recent soil radiocarbon synthesis efforts demonstrate the utility of these data for improving  
39 predictions of SOM dynamics (He et al., 2016; Mathieu et al., 2015). However, bulk soil  
40 radiocarbon measurements alone do not accurately predict the true timescales of soil carbon  
41 cycling (Trumbore, 2000). Using radiocarbon to calculate SOM dynamics requires partitioning  
42 SOM into pools with different characteristic mean ages and cycling rates. The pool partitioning  
43 approach is easily implemented in SOM models, but in reality, measuring these pools is both  
44 challenging and dependent on the techniques used to fractionate the bulk soil (Moni et al., 2012).  
45 A second measure of carbon cycling rates in soils is the transit time, or the mean age of carbon  
46 leaving the soil as respired  $\text{CO}_2$  or in dissolved forms (Sierra et al., 2017). The modeled transit  
47 time can be constrained by measurements of the radiocarbon signature of carbon in these fluxes.  
48 Critically, both approaches using radiocarbon to estimate the timescales of carbon cycling in soils  
49 require multiple measurements of carbon in distinct soil reservoirs.

50

51 Ongoing study of soils has led to shifting conceptual views of the controls on SOM dynamics  
52 (Blankinship et al., 2018; Lehmann and Kleber, 2015; Schmidt and Torn et al., 2011). Current  
53 conceptual views that emphasize the protection of SOM from microbial decomposition via  
54 physical isolation or sorption to soil mineral surfaces (Lehmann and Kleber, 2015) and within  
55 anaerobic microsites (Keiluweit et al., 2016) have largely replaced earlier paradigms of  
56 humification, selective preservation, and progressive decomposition. Two fundamental questions  
57 currently driving SOM research are: (1) which factors determine the fraction of organic inputs to  
58 soil that are quickly lost from soils or retained in soil organic matter; and (2) which mechanisms  
59 contribute to the stabilization or protection of SOM? To address these questions, researchers  
60 typically measure the concentration and/or mass content of organic carbon along with other



61 properties, including molecular composition, isotopic ratios, and the distribution of SOM between  
62 conceptually or operationally defined pools

63

64 Soil fractionation is the operationally defined separation of soils into distinct pools or “fractions”  
65 through a variety of physical, chemical, and biological approaches. Soil fractionation is generally  
66 intended to isolate soil fractions that reflect SOM in different physico-chemical states or  
67 mechanisms of SOM protection; these mechanisms may operate on distinct temporal scales. For  
68 example, density fractionation of SOM is a commonly applied technique (Crow et al., 2007;  
69 Sollins et al., 2009; 2006; Swanston et al. 2005). The “light” soil material that floats in a dense  
70 solution (e.g., sodium polytungstate) or gets picked up by electrostatic attraction (Kaiser et al.,  
71 2009) are sometimes used as proxies for rapidly cycling SOM, while the “heavy” or dense material  
72 is used as a proxy for mineral-associated SOM, which is assumed to cycle more slowly. In some  
73 cases, sonication of the suspension may be used to further isolate occluded SOM, i.e., organic  
74 material in soil aggregates (Kaiser and Berhe, 2014). Other methods for isolating SOM with  
75 different cycling rates in the soil include, but are not limited to, physical separation of aggregates  
76 by size and water-stability (Jastrow et al., 2006; Plante et al., 2006; Six and Paustian, 2014) or of  
77 different-sized soil particles (Desjardins et al., 1994), biological incubation of soils (Torn et al.,  
78 2005; Trumbore, 2000; Paul, et al., 2001), and chemical extractions (Heckman et al., 2018;  
79 Masiello et al., 2004).

80

81 Comparing the mass and radiocarbon signature of the carbon leaving or entering the soil system  
82 (fluxes) with those of specific soil fractions provides insight into the rates of transfers between  
83 pools, as well as differentiating between the mean age and the transit time for the whole soil, a  
84 given depth increment or a given SOM pool (Sierra et al., 2012; Ohno et al., 2017; Ziegler et al.,  
85 2017; Szymanski et al., 2019). Similarly, measurements of interstitial soil carbon (i.e., in soil water  
86 or gases collected from within an intact soil profile) and its isotopic signature provide key  
87 information about the dynamics of the carbon present in the soil solution. Soluble carbon is  
88 believed to be the dominant pathway for vertical transport of organic carbon (Kaiser and Kalbitz,  
89 2012; Angst et al., 2016), and also an intermediate stage through which carbon exchanges from  
90 being vulnerable to microbial decomposition to being stabilized on mineral surfaces (Jackson et  
91 al., 2017; Leinemann et al., 2018).



92

93 Measurements of bulk soils as well as soil fractions are evaluated in the context of other soil  
94 properties to better understand the controls on SOM preservation. However, the diversity of soil  
95 fractionation methods makes it difficult to compare measurements across soils or to evaluate best  
96 practices. Combining radiocarbon measurements of soil carbon fractions, incubations, interstitial  
97 observations (i.e., measurements of dissolved or gaseous carbon forms), and fluxes has proven  
98 useful in resolving the contribution of different soil carbon persistence mechanisms in a site-  
99 specific modeling context (Braakhekke et al., 2015), but the application of this approach beyond  
100 the site-scale has thus far been limited due to the lack of globally synthesized data.

101

102 With a changing paradigm for SOM dynamics and ever-evolving SOM models, it is more  
103 important now than ever that we synthesize existing soil radiocarbon measurements *and* provide a  
104 central repository for new data. There have been previous efforts to develop a soil radiocarbon  
105 database (Becker-Heidmann, 1996; 2010; Trumbore et al. 2011), separately or integrated with a  
106 general-purpose soil carbon database (Harden et al., 2017). However, a challenge remains: to  
107 compile and organize soil radiocarbon data that has been collected in many different and complex  
108 ways (e.g., using various fractionation methods or including fluxes as well as organic matter  
109 pools). Addressing this challenge will provide new opportunities to leverage existing soil  
110 radiocarbon data for critical research such as developing practical and theoretical insights into the  
111 information contained in various fractionation methods and how they relate to one another,  
112 expanding our understanding of controls on soil carbon dynamics, and facilitating broader  
113 integration of radiocarbon constraints on soil carbon turnover in Earth surface models. For  
114 example, He et al. (2016) leveraged a synthesis of bulk-soil radiocarbon data to better constrain  
115 the age of carbon in five Earth system models, demonstrating that without this added constraint,  
116 these models overestimate soil carbon sequestration potential by an average of 40%.

117

118 Here  present a flexible database spanning broad spatial scales and capturing a range of data  
119 types including diverse soil fractionation methods, incubations, fluxes, interstitial measurements  
120 and spanning a range of spatial scales. Our goal is to provide an open-access data resource that  
121 will encourage the scientific community to apply the database for a variety of synthesis studies or  
122 metaanalyses and also contribute data to the repository.



123

## 124 2. The Soil Radiocarbon Database (ISRaD)

125 ISRaD (v1.0) is designed to be an open-source platform that (1) provides a repository for soil  
126 radiocarbon and associated measurements, (2) is able to accommodate data collected from a large  
127 variety of soil fractionation techniques, and (3) is flexible and adaptable enough to accommodate  
128 new variables and data types. The ISRaD v1.0 data is archived and freely available at  
129 <https://doi.org/10.5281/zenodo.2613911> (Lawrence et al., 2019). Access to additional information  
130 as well as the various ISRaD resources described below is provided through the ISRaD web  
131 interface ([soilradiocarbon.org](http://soilradiocarbon.org)).

132

### 133 2.1 Database and Dataset Structure

134 In its most general form, ISRaD is an implicitly relational database. It consists of a linked  
135 hierarchical list of tables that contain soil measurements, i.e. variables (Fig. 2). The fundamental  
136 unit of organization in ISRaD is the *entry*, which corresponds to a unique dataset i.e., a dataset  
137 with a digital object identifier (DOI), while each subordinate table corresponds to data from that  
138 entry with a particular spatial or temporal dimension (Fig. 1).

139

140 Transparency and traceability are fundamental tenants of ISRaD. Accordingly, each entry, whether  
141 ingested individually or as a compilation, must have a DOI. For data from published studies, the  
142 DOI of the publication is acceptable. Data from unpublished studies must be registered for a DOI  
143 through a DOI registration agency (e.g., [zenodo.org](http://zenodo.org), [www.pangaea.de/](http://www.pangaea.de/), etc.) prior to ingestion into  
144 ISRaD. As it is equally important to be able to reconstruct prior data compilations e.g., synthesis  
145 studies, the specific references for individual datasets making up a synthesis are ingested as part  
146 of the synthesis entry and the entry is flagged with a reference the synthesis study itself. For  
147 example, several of the major data sources added to ISRaD were synthesis studies (e.g., He et al.,  
148 2016; Mathieu et al., 2015), and users can generate reports of data from these prior syntheses by  
149 constructing a query that utilizes this synthesis flag.

150





## 151 2.2 Data Hierarchy

152 The ISRaD data hierarchy consists of eight levels of information. The top level of the data  
153 hierarchy is the metadata table (1), which includes information describing the source of data for a  
154 particular entry. The remainder of the hierarchical levels can be defined by the spatial extent of the  
155 information included in each table. The site (2), profile (3), layer (4), and fraction (5) tables  
156 represent information captured from decreasing spatial extents: from the scale of the study area to  
157 individual mass fractions isolated from a single soil sample. Special cases of the last three spatial  
158 extents further accommodate the temporal context of repeated measurements: (6) fluxes, (7)  
159 interstitial, and (8) incubations. In the sub-sections below, we provide overviews and examples of  
160 the types of information reported at each level, and for each of the tables that occupy these levels  
161 (Fig. 1).

162  
163 The data hierarchy is maintained across tables through the use of unique keys, or linking variables  
164 (noted with a “\*” in the following descriptions) that are required in each record (row) of data in  
165 each table. In addition to the table-specific key, each subordinate table in the hierarchy must also  
166 contain the key variables of the above tables. For example, in addition to a unique *layer\_name*,  
167 each record in the layer table must also be associated with an *entry\_name*, *site\_name*, and  
168 *pro\_name* (profile name) i.e., the key variables for the metadata, site, and profile tables.

169  
170 ISRaD provides basic quality assurance/quality control (QA/QC) protocols (described below)  
171 applied when ingesting entries. These protocols are used to ensure required variables are complete  
172 and that the key variables match across levels of the hierarchy (more detail below). Additionally,  
173 each table includes some mandatory variables that are required in order for the entry to be ingested.  
174 Variables that are not designated as mandatory need only be completed if those data are available.  
175 The ISRaD template and a detailed description containing the full list of variables along with  
176 instructions for populating the template can be downloaded or viewed from the “Contribute” page  
177 of the web-interface ([soilradiocarbon.org](http://soilradiocarbon.org)).

178  
179 For all variables across all hierarchical levels, it is important to observe the acceptable data types  
180 (character, numeric) and units. Variable names, descriptions, and reporting conventions are given  
181 in the heading columns of the ISRaD template file (ISRaD\_Template.xlsx) and more detailed





182 information is provided in the data dictionary (ISRaD\_Template\_Info.xlsx). Allowed values  
183 include unrestricted text, controlled text, or numeric variables with or without defined ranges.  
184 Unrestricted text is generally limited to naming and note data fields, while controlled text fields  
185 are implemented for certain variables in an attempt to standardize the data and simplify data  
186 analysis. In the event that desired variables are not included in the current version of ISRaD, users  
187 may submit a request to add new variables. This process is initiated by posting an issue at the  
188 ISRaD GitHub repository and is described in more detail in section 3.4.

189

#### 190 2.2.1 Metadata Table

191 The metadata table provides information for the characterization of the entry itself. Required  
192 metadata includes the entry name (i.e., *entry\_name*\*), the DOI, the data curator (the person who  
193 oversees template entry), and their contact information. The entry name is the key variable used to  
194 match the entry with measurements reported at the other data levels.

195

#### 196 2.2.2 Site Data Table

197 Site-level data are limited to the geospatial details defining the coarsest scale of the study area(s)  
198 included in each entry. We define a site as a spatially defined location that includes one or more  
199 soil profiles. By convention, we define a site as having  $\geq 51$  radius, i.e., samples collected within  
200 5 km of each other should be grouped under the same “site” designation. However, the 5 km radius  
201 is a convention only, as the distinction between site and profile may be study-specific, and  
202 geospatial data at this resolution is not always available for legacy datasets. The required fields at  
203 the site level are limited to the site name (*site\_name*), latitude, and longitude. In other words,  
204 spatial coordinates are required to designate a site. Every entry must specify a minimum of one  
205 site location, but can include multiple sites that do not need to be located in close proximity. For  
206 entries that do not report spatial coordinates, the data curator may estimate latitude and longitude  
207 based on the description of the study area using any of the widely acceptable mapping software  
208 (e.g., Google Earth, Google Maps, etc.). The site level does not include fields for reporting site  
209 properties. Such directly measured variables are reported at the profile level. The intended purpose  
210 of the site level data is to provide at least coarse-scale geospatial coordinates for extracting  
211 consistently sourced parameters from geospatial datasets, which can then be compared against the  
212 range of measurements reported at the profile level.



213

## 214 2.2.3 Profile Data Table

215 Profile-level data includes details pertaining to the specific sampling location of each soil. If  
216 available, profile-scale spatial coordinates should be provided in addition to site-scale coordinates.

217

218 Many variables that may initially appear to belong at the site level are instead included at the  
219 profile level to facilitate accurate representation of spatial heterogeneity at a finer scale than the  
220 site level (e.g., for multiple profiles observed at the same site). Examples include local mean annual  
221 temperature and precipitation, soil taxonomic classification, vegetation type, land cover, depth to  
222 bedrock, and parent material composition. Other than the entry name and site name, the only  
223 additional required variable at the profile-level is the profile name (*pro\_name*).

224

## 225 2.2.4 Flux Data Table

226 Soil flux data present a special case of observations that correspond to the profile level of the  
227 database hierarchy. Flux-level data allows for reporting of temporally explicit measurements of  
228 mass or energy transfer occurring at the profile scale. Both gas and liquid analytes (e.g. CO<sub>2</sub>, CH<sub>4</sub>,  
229 dissolved OC, particulate OC, etc.) may be reported in flux data. In addition to the profile name,  
230 records with flux data must also include the observation date (*flx\_obs\_date*). Data measured at  
231 multiple time points in a single location will have identical profile names but unique temporal data.

232

## 233 2.2.5 Layer Data Table

234 Layer level data corresponds to measurements made for a specific depth increment collected from  
235 a soil profile. The required variables at the layer level include layer name (*lyr\_name*), depth of  
236 layer top, and depth of layer bottom. The latter two variables describe the upper and lower range  
237 of the sampling depth, respectively, in units of centimeters. We use a depth reporting system where  
238 the top of the mineral soil is denoted as zero and subsequent depths below that point are reported  
239 with incrementally increasing positive values. Organic horizons are thus reported as negative depth  
240 intervals. Special indicator fields (*lyr\_all\_org\_neg* and *ist\_all\_org\_neg*) are used when the depth  
241 to the mineral soil is unknown, e.g. for deep organic horizons or peats. The layer level is where  
242 most common measurements of soil physical, chemical, and/or biological properties are reported.



243 As such, there is an ever-increasing list of variables that may be reported at the layer level. Users  
244 should consult the up-to-date template instruction file for the complete list of accepted variables.  
245

#### 246 2.2.6 Interstitial Data Table

247 The interstitial level is a special case of layer-level data. Specifically, interstitial data refers to  
248 measurements made on material occupying the interstices of the soil structure. In most cases, this  
249 material can be thought of as being mobile relative to the rest of the soil matter. Some common  
250 examples include gases, liquids, and colloids. Like flux data, the interstitial data table  
251 accommodates repeated measurements of these properties through time and as such, the  
252 observation date must be recorded for each record in the interstitial table. Because interstitial  
253 records may not correspond to the same depth increments defined for solid phase analyses, separate  
254 entries may be used in the layer table. Both sampling methodology as well as the properties of  
255 interstitial samples are reported in the interstitial table.

256

#### 257 2.2.7 Fraction Data Table

258 Compared with most other soil databases, the fraction data table of the ISRaD is unique. The  
259 fraction data fields are designed to accommodate and allow for fair comparison of the wide-ranging  
260 methodologies utilized to partition soils into discrete fractions. As such, there are more required  
261 fields for the fraction level compared with the other hierarchical levels. These required fields  
262 include fraction name (*frc\_name*); the input source (*frc\_input*), which can be the name of another  
263 fraction or bulk (unfractionated) soil layer fraction scheme (*frc\_scheme*), which is a controlled set  
264 of terms describing the general class of fractionation procedure used; the fractionation agent  
265 (*frc\_agent*), which provides additional detail for methods that have multiple options; the upper and  
266 lower boundaries (*frc\_lower* and *frc\_upper*), which allow for description of the fractionation  
267 thresholds used in the fractionation procedure; and finally the fraction scheme units  
268 (*frc\_scheme\_units*), which describes the units of reference for the cut-off thresholds.

269

270 For example (see figure 3), most soil density fraction (*frc\_scheme* = density) procedures starts with  
271 bulk soil from the layer in question (*frc\_input* = bulk). The first distinct fraction, “free light”, is  
272 isolated by floating the soil in a heavy solution, e.g. sodium polytungstate (*frc\_agent* = SPT). If  
273 the density of the sodium polytungstate used in density separation step was  $1.6 \text{ g cm}^{-3}$ , *frc\_lower*



274 for the “free light” fraction = 0 (indicating that anything with a density less than 1.6 was included),  
275  $frc\_upper = 1.6$ , and  $frc\_scheme\_units = g\ cm^3$ . In addition to these required fields, the fraction-  
276 level data may include most of the same data fields that are reported for the layer-level data. Ideally  
277 the fraction data also includes the mass percentage of the total sample represented by the fraction  
278 as well as the specific carbon concentration and carbon isotopic composition of the fraction, which  
279 are critical for relating bulk and fraction level observations..

280

### 281 2.2.8 Incubation Data Table

282 Flux rates and isotopic signatures of incubated samples are reported in the incubation table, at the  
283 fraction level of the ISRaD hierarchy. Sample processing data (e.g., whether or not roots have been  
284 removed from samples prior to incubation) are recorded, as well as incubation conditions (e.g.  
285 temperature, moisture, duration). Repeat measurements, such as incubation time series, can also  
286 be recorded, but not manipulations such as nutrient additions (e.g., priming). Incubation records  
287 must be linked either to a layer or both a fraction and a layer, such as roots isolated from a specific  
288 depth interval.

289

### 290 2.3 Data Ingestion

291 New data entries are added, or ingested, into ISRaD through a user-initiated process. The most  
292 common means of ingesting entries is via a template provided on the ISRaD web interface  
293 (*ISRaD\_Master\_Template.xlsx*). The template is intended to be used in combination with the data  
294 dictionary (*ISRaD\_Template\_Info.xlsx*). These files and other supporting documentation (user  
295 guide and FAQ) are also available at the web interface. Completed entries that have been formatted  
296 for ingestion must also pass the automated QA/QC test before the ingestion process can proceed.  
297 Users can initiate QA/QC using the ISRaD-R package (described below), or directly from the  
298 ISRaD web interface. If the entry fails QA/QC, the report from the test can be used as a guide to  
299 make corrections. Once an entry passes QA/QC, it can be submitted for the final two steps of the  
300 ingestion process: expert review and final ingestion.

301

302 Data templates that have passed QA/QC should be submitted via email to ISRaD at  
303 [info.israd@gmail.com](mailto:info.israd@gmail.com). These templates are then distributed to ISRaD expert reviewers who  
304 inspect template files to ensure proper completion of the more complex aspects of the template,



305 such as classification of soil fractionation methods. If problems are identified with a submitted  
306 dataset during the expert review process, reviewers will work with the data curator to ensure these  
307 problems are corrected. Once the expert reviewer signs off on a submitted template, it will be  
308 ingested into the database.

### 309 3. Database Infrastructure

#### 310 3.1 ISRaD v1.0

311 The current version, v1.0, of ISRaD includes a total of 195 individual data entries and 503 sites  
312 spanning the globe (Fig. 3). The current distribution of data across the various levels of the  
313 database hierarchy are shown in Table 1, and a full list of data entry references is provided in  
314 Supplemental Table 1.

315

316 Users may access ISRaD and its supporting information three ways: (1) the web interface, (2) the  
317 ISRaD-R package, and (3) the GitHub repository. Each of these access points is described in more  
318 detail below.

319

#### 320 3.2 The ISRaD Web Interface

321 Most simply, users can access ISRaD data and associated resources by way of the web interface  
322 (<https://soilradiocarbon.org>). From the web interface users can download pre-compiled versions  
323 of the database in a simple file format (.csv), which can be easily ingested into graphical or  
324 database software. The web interface also provides access to the most recent versions of the ISRaD  
325 entry template, the template information file, an up-to-date list of the datasets included in the latest  
326 version of ISRaD, the QA/QC tool, and a variety of other resources for assisting with filling out  
327 data templates and interacting with ISRaD data.

328

#### 329 3.3 The ISRaD-R package

330 All ISRaD users, but especially those already familiar with the R computing environment (R  
331 Foundation for Statistical Computing, Vienna, Austria), are encouraged to download the ISRaD-  
332 R package (also called *ISRaD* and available at the CRAN repository, <https://cran.r-project.org/>).  
333 At present, we provide some basic tools for compiling data in the ISRaD template format into an  
334 ISRaD-structured database, and downloading both archived and current versions of the database



335 from the ISRaD github repository as an R list object (.rda file), or .xlsx file. The ISRaD-R package  
336 includes two data objects: (1) *ISRaD\_data*, which includes only data entered from the original  
337 source studies and (2) *ISRaD\_extra*, which includes the original source data as well as gap-filled  
338 and additional variables that have been calculated or filled from external geospatial data sources.  
339 Value-added data included in the current implementation of *ISRaD\_extra* are described in Table  
340 2.

341

342 The ISRaD-R package also includes support for an R-Shiny application that provides a simple  
343 graphical user interface (GUI), with which users can perform several basic functions. The GUI  
344 allows for preliminary data visualization, which is intended for quick assessment and/or filtering  
345 of the database.

346

347 A few simple report functions are built into the ISRaD-R package that can be used to produce basic  
348 data summaries and visualizations for the full dataset or user-defined subsets. However, ISRaD  
349 has been designed for ease of use in the R environment in order for users to be able to take  
350 advantage of the full suite of R capabilities and functionality to manipulate and analyze ISRaD  
351 data. A number of vignettes including R scripts for some commonly used data manipulations or  
352 plotting are given on the web site and are also included in the ISRaD-R package installation.

353

### 354 3.4 The ISRaD GitHub Repository

355 The source code for the ISRaD-R package is hosted under version control on the GitHub repository  
356 ISRaD (<https://github.com/International-Soil-Radiocarbon-Database/ISRaD>) (GitHub Inc., San  
357 Francisco, CA). This platform is used to facilitate the open-source collaborative development of  
358 ISRaD data and additional database tools. Through the GitHub interface, users may (1) access data  
359 entries included in the compiled database; (2) evaluate and suggest modifications of the underlying  
360 code used for compilation, QA/QC, and calculation of the additional variables included in either  
361 the compiled ISRaD data object (*ISRaD\_data*) or in the augmented data product (*ISRaD\_extra*);  
362 and (3) report problems, questions, or other issues.

363



### 364 3.5 The Soil Carbon Information Hub

365 For students or non-experts interested in learning more about the science behind the data, we have  
366 developed the Soil Organic Carbon Information Hub (SOC-Hub). SOC-Hub ([https://international-](https://international-soil-radiocarbon-database.github.io/SOC-Hub/)  
367 [soil-radiocarbon-database.github.io/SOC-Hub/](https://international-soil-radiocarbon-database.github.io/SOC-Hub/)) is a set of articles in the form of blog posts  
368 providing background information on soils, radiocarbon, the terrestrial carbon cycle, and soil  
369 models. A large portion of the content for this site was created by students, and whenever possible  
370 uses non-technical language to describe topics pertinent to ISRaD. Technical editing of the SOC-  
371 Hub is facilitated through the ISRaD GitHub repository. Users are welcome and encouraged to  
372 contribute to or improve the content in SOC-Hub.

## 373 4. Database Operations

### 374 4.1 Accessing data entries

375 Individual data entries (i.e., completed templates, or templates output from ingested compilations)  
376 that have passed QA/QC and the expert review process are hosted in the “ISRaD\_data\_files” folder  
377 of the GitHub repository. Users may download these entries in order to add new data or to make  
378 corrections to existing data if problems are discovered. Corrected files can be resubmitted to  
379 ISRaD once they pass QA/QC by emailing the updated template and a text file of the QA/QC  
380 report to the ISRaD editor ([info.israd@gmail.com](mailto:info.israd@gmail.com)), and will be reingested after passing the expert  
381 review process. This process of user-initiated revision of existing data entries is particularly useful  
382 when large data compilations are ingested into ISRaD from previously published syntheses (e.g.,  
383 He et al., 2016; Mathieu et al., 2015) or when publications report treatment means. Depending on  
384 the scope of the synthesis efforts, entries ingested into ISRaD this way may omit data available  
385 from the original studies, and the entry modification process allows those data to be added or  
386 corrected as needed.

387

### 388 4.2 Accessing code

389 Access to the source code underlying the ISRaD database compilation and calculations allows for  
390 users to check for errors and contribute to the functionality of ISRaD. Users with a registered  
391 GitHub account are invited to write code that adds to or improves upon the existing database tools.  
392 Using standard GitHub tools, users will submit a “pull request”, and following code testing and





393 evaluation of utility to the ISRaD community, user-submitted code will be incorporated into the  
394 ISRaD-R package.

395

396 4.3 Reporting Issues, making suggestions, and asking questions.

397 One of the most important tools available to ISRaD users is the ability to post questions, report  
398 issues, or make suggestions, including requests to incorporate new variables. We use issue tracking  
399 tools provided by GitHub to track and categorize user input including: suggestions for  
400 improvements; problems or errors with web interface, the R-package, code, or any other aspects  
401 of ISRaD; requests for new variables or issues related to existing variables (e.g., incorrect  
402 acceptable ranges used in QA/QC); or asking questions related to template entry or any other  
403 aspect of ISRaD. While the GitHub issue-reporting functionality is the preferred means for  
404 reporting questions or issues with the database or process, it does require that users register a  
405 GitHub account. Users who do not wish to or are not able to register with GitHub, can also submit  
406 issues or questions via an email to the ISRaD editor ([info.israd@gmail.com](mailto:info.israd@gmail.com)), however, the  
407 response time may be slower.

408

409 4.4 Database Versioning and Archiving

410 Updated versions of the database will be periodically released following substantial changes or  
411 ingestion of new datasets. Versioning of these official releases are tracked an associated version  
412 number, e.g., ISRaD v1.0, and so on. These official releases will be annually archived at the USGS  
413 Science Base repository and at Zenodo (<https://zenodo.org/>), with a dataset DOI issued for each  
414 release. These archived releases will be maintained into perpetuity to facilitate reproduction of any  
415 analyses conducted using a past version of the database. Additionally, each release of a new ISRaD  
416 version will correspond with the splitting of a stable branch of the GitHub repository, where the  
417 particular versions of the ISRaD-R package and the underlying code will be maintained in a stable  
418 state so that users may revert back to the earlier version if so required. In the interim between  
419 official releases, updates to the dataset (including ingestion of new data) and database  
420 infrastructure are tracked via the Git commit identifier, which is a unique alphanumeric string  
421 issued anytime the repository is modified. When accessing the dataset, users should record the  
422 most recent stable version number as well as the most recent commit identifier.

423



#### 424 4.5 Data Sharing Between Soil Databases

425 ISRaD is not the only soils database available to the international research community. The  
426 primary niche of ISRaD is the ability to synthesize soil radiocarbon data and provide a framework  
427 for comparing soil carbon fraction data. For other purposes, there may be other soil databases that  
428 are more applicable. However, as a benefit of adding data to ISRaD, we facilitate sharing of data  
429 ingested into ISRaD with other databases developed by the soil science community. At present,  
430 ISRaD has a reciprocal agreement with the International Soil Carbon Network (ISCN), which is  
431 focused on soil carbon content and related variables from bulk soils (i.e., no isotope or soil fraction  
432 information). As per this agreement, the ISCN retrieves bulk soil data from ISRaD, and is  
433 responsible for filtering duplicate entries and incorporating any new data into the ISCN database.

#### 434 5. Database Governance

435 ISRaD is a community effort with multiple contributors operating at different levels. Governance  
436 of ISRaD is required in order to ensure continuity of services and to plan for the future evolution  
437 of this data repository. The governance structure of the ISRaD is pyramid shaped (Fig. 5).

438 The ISRaD *scientific steering committee* (SSC) consists of a rotating group of 7 scientists and data  
439 managers. The committee members are nominated and voted into service by a majority vote of the  
440 existing steering committee. The role of the steering committee is to determine the feasibility of  
441 major changes to ISRaD proposed by the community; to oversee data management, archiving, and  
442 establishment of cooperative agreements; and to coordinate activities and funding of affiliated  
443 institutions.

444

445 Database *maintainers* oversee the development and maintenance of the technical resources  
446 underlying ISRaD. For example, these individuals are responsible for overseeing GitHub pull  
447 requests and managing major changes in the ISRaD data template and/or data structure. The ISRaD  
448 associate editor is a special case of maintainer, whose role also includes assigning submitted  
449 templates to expert reviewers (described below) and periodically rebuilding the database with new  
450 entries that have passed the expert review process.

451

452 Data *contributors* are users who contribute data to ISRaD. Anyone can be a data contributor  
453 provided they agree to the terms of use and follow the proper steps for contributing data to ISRaD.



454 Within the pool of data contributors, individuals with significant experience working within the  
455 ISRaD structure may be designated, either by the steering committee or database maintainers, as  
456 *expert reviewers*. These individuals are tasked to assist maintainers and oversee peer review of  
457 contributed entries. Although the automated QA/QC tools are designed to catch many common  
458 errors in the data ingestion process, review by these expert contributors ensures the integrity of the  
459 data within ISRaD.

460

461 Finally, ISRaD *data users* are individuals who are accessing ISRaD or ISRaD-supported resources  
462 to utilize data and other resources rather than to contribute data. Anyone can be a data user  
463 provided they agree to the basic user guidelines and terms of use described in the next section.

464

465 Although the structure of the ISRaD governance pyramid is oriented around individual users, the  
466 nature of scientific research is often more group-focused. For example, teams of researchers  
467 generally work together to seek out funding and to conduct research. Thus, in some cases a group  
468 or team of individuals may seek to utilize or modify ISRaD for their purposes. Such groups can  
469 petition the scientific steering committee to be formally designated as an ISRaD organization. This  
470 process should be followed when groups seek to leverage the ISRaD resources beyond the scope  
471 of a basic user or contributor. The steering committee will consider the scope of the work proposed  
472 by the group and, when appropriate, provide a letter of support for funding proposals. Approved  
473 organizations should nominate a member to serve on the steering committee and, in the case of  
474 organizations making large changes or additions to ISRaD, a data maintainer to coordinate the  
475 technical aspects of that work.

## 476 6. Database Availability and User Guidelines

477 As detailed above, ISRaD is an open source project that provides several ways for participation.  
478 ISRaD v1.0 data (Lawrence et al., 2019) is archived and freely available at  
479 <https://doi.org/10.5281/zenodo.2613911> Anyone may share or adapt the ISRaD dataset provided  
480 they do so in accordance with the Creative Commons Attribution 4.0 International Public License  
481 (<https://creativecommons.org/licenses/by/4.0/legalcode>), also referred to as CC-By. In addition,  
482 we strongly encourage ISRaD users to follow two simple guidelines for use:

483



- 484 (1) When utilizing the resources provided by ISRaD, including the complete dataset,  
485 individually curated entries, or value-added calculations included in the R-package, users  
486 should cite this publication and reference the version of ISRaD that was used for their work  
487 (see section 3.6 above). Additionally, if users leverage individual data entries from the  
488 database, they should also cite the original source dataset and/or paper.
- 489 (2) When users interpret their own data in the context of data accessed from ISRaD, they  
490 should submit those new data for inclusion in ISRaD after they have published their results  
491 and/or obtained a DOI for their dataset.

## 492 7. Conclusions and Outlook

493 ISRaD is an interactive open source data repository specializing in radiocarbon data associated  
494 with measurements of soils spanning a broad range of spatial scales. The ISRaD dataset is unique  
495 in that it includes not only measurements of bulk soils but also measurements of soil water, gases,  
496 and the wide diversity of soil pools isolated through different fractionation methodologies. Most  
497 of the studies summarized in ISRaD were conducted with a goal of understanding the factors  
498 controlling timescales of carbon cycling in specific sites, regions or biomes. ISRaD is an attempt  
499 to gather the data from these individual studies in one place and in the same format to facilitate  
500 comparisons and synthesis activities. There are three ways through which potential users can  
501 access ISRaD: (1) the web-interface enables users to download of the most recently compiled  
502 report formatted as a .csv file, (2) the ISRaD-R package provides access to the compiled reports  
503 as well as visualization tools and R-based querying tools, or (3) the GitHub repository provides  
504 direct access to the source code for the ISRaD-R package, as well as data from individual entries  
505 and the compiled database. Currently, the ISRaD dataset contains ~8500 radiocarbon analyses,  
506 which, at a typical cost ~\$500 each, represent over US \$4,250,000 dollars of research investment.  
507 By providing a useful platform for existing data, we hope to encourage the community to increase  
508 the effectiveness of that investment, and to use the ISRaD platform as a repository to increase the  
509 impact of new results. Many opportunities exist for applying ISRaD data for improving our  
510 understanding of controls on soil carbon dynamics, for comparing different methodologies of  
511 characterizing soils, or for constraining soil processes in models ranging from profile to global  
512 scales.

513



## 514 8. Author Contribution

515 The creation of ISRaD was a community effort. The initial concept to build ISRaD started with  
516 the USGS Powell Center working group on Soil Carbon Storage and Stability but benefited greatly  
517 from early efforts of the International Soil Carbon Network and other individual efforts to compile  
518 soil fraction or radiocarbon data. Scientists from the Max Planck Institute for Biogeochemistry  
519 joined forces with the Powell Center group to greatly expand the scope and technical complexity  
520 of the ISRaD. CL, JBM, AH, GM, CS, SS, KH, JB, SC, GMc, and ST designed and built ISRaD  
521 as well as led the preparation of the manuscript. PL, OV, KTB, CR, CHP, CS, KM, and SD  
522 provided technical contributions, including coding, to the creation of the database as well as  
523 assisted with the ingestion of data. CH, YH, CT, JH, MT, and CEA provided large datasets or data  
524 compilations. AAB, MK, EMS, AP, AT, JS, LV, and RW contributed to the conceptual framing  
525 of the ISRaD and assisted with data ingestion. All authors read and commented on the manuscript.

## 526 9. Acknowledgments

527 We gratefully acknowledge funding support for this work from the US Geological Survey Powell  
528 Center, the Max Planck Institute for Biogeochemistry, the European Research Council (Horizon  
529 2020 research and innovation programme - grant agreement No. 695101), the USGS Land Change  
530 Science program, and the US Department of Agriculture. Any use of trade, firm, or product names  
531 is for descriptive purposes only and does not imply endorsement by the U.S. Government.  
532

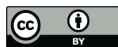

## 10. Citations

Anderson, DW., Paul, EA. Organo-mineral complexes and their study by radiocarbon dating. *Soil Science Society of America Journal*, 48(2), 298-301, 1984.

Angst, G., Kögel-Knabner, I., Kirfel, K., Hertel, D. and Mueller, C. W.: Spatial distribution and chemical composition of soil organic matter fractions in rhizosphere and non-rhizosphere soil under European beech (*Fagus sylvatica* L.), *Geoderma*, 264, 179–187, doi:10.1016/j.geoderma.2015.10.016, 2016.

Balesdent, J. The turnover of soil organic fractions estimated by radiocarbon dating. *Science of the total environment*, 62, 405-408, 1987.

Becker-Heidmann, P.: Requirements for An International Radiocarbon Soils Database, *Radiocarbon*, 38(02), 177–180, doi:10.1017/S0033822200017549, 1996.

Becker-Heidmann, P.: A new attempt to establish the international radiocarbon soils database (IRSDB), *Radiocarbon*, 52, 1405–1410, 2010.

Blankinship, J. C., Berhe, A. A., Crow, S. E., Druhan, J. L., Heckman, K. A., Keiluweit, M., Lawrence, C. R., Marin-Spiotta, E., Plante, A. F., Rasmussen, C., Schädel, C., Schimel, J. P., Sierra, C. A., Wagai, R. and Wieder, W. R.: Improving understanding of soil organic matter dynamics by triangulating theories, measurements, and models, *Biogeochemistry*, 140(1), 1–13, doi:10.1007/s10533-018-0478-2, 2018.

Braakhekke, M. C., Guggenberger, G., Schrumpf, M. and Reichstein, M.: Contribution of sorption, DOC transport and microbial interactions to the <sup>14</sup>C age of a soil organic carbon profile: Insights from a calibrated process model, *Soil Biol Biochem*, 88(C), 390–402, doi:10.1016/j.soilbio.2015.06.008, 2015.

Bradford, M. A., Wieder, W. R., Bonan, G. B., Fierer, N., Raymond, P. A. and Crowther, T. W.: Managing uncertainty in soil carbon feedbacks to climate change, *Nature Climate Change*, 6(8), 751–758, doi:10.1038/nclimate3071, 2016.



Cherkinskii, AE. Contemporary hypotheses of humification and radiocarbon analyses of some types of soils. *Doklady Akademii nauk SSSR*, 258(4), 993-996, 1981.

Crow, S. E., Swanston, C. W., Lajtha, K., Brooks, J. R. and Keirstead, H.: Density fractionation of forest soils: methodological questions and interpretation of incubation results and turnover time in an ecosystem context, *Biogeochemistry*, 85(1), 69–90, doi:10.1007/s10533-007-9100-8, 2007.

Desjardins, T., Andreux, F., Volkoff, B. and Cerri, C. C.: Organic carbon and  $^{13}\text{C}$  contents in soils and soil size-fractions, and their changes due to deforestation and pasture installation in eastern Amazonia, *Geoderma*, 61(1-2), 103–118, doi:10.1016/0016-7061(94)90013-2, 1994.

Goh, KM., Stout, JD., Rafter, TA. Radiocarbon enrichment of soil organic-matter fractions in New Zealand soils. *Soil Science*, 123(6), 385-391, 1977.

Harden, J. W., Hugelius, G., Blankinship, J. C., Bond-Lamberty, B., Lawrence, C. R., Loisel, J., Malhotra, A., Jackson, R. B., Ogle, S., Phillips, C., Ryals, R., Todd-Brown, K., Vargas, R., Vergara, S. E., Cotrufo, M. F., Keiluweit, M., Heckman, K. A., Crow, S. E., Silver, W. L., DeLonge, M. and Nave, L. E.: Networking our science to characterize the state, vulnerabilities, and management opportunities of soil organic matter, *Global Change Biol*, 348(2), 895–14, doi:10.1111/gcb.13896, 2017.

He, Y., Trumbore, S. E., Torn, M. S., Harden, J. W., Vaughn, L. J. S., Allison, S. D. and Randerson, J. T.: Radiocarbon constraints imply reduced carbon uptake by soils during the 21st century, *Science*, 355(6306), 1419–1424, doi:10.1126/science.aag0262, 2016.

Heckman, K., Lawrence, C. R. and Harden, J. W.: A sequential selective dissolution method to quantify storage and stability of organic carbon associated with Al and Fe hydroxide phases, *Geoderma*, 312, 24–35, doi:10.1016/j.geoderma.2017.09.043, 2018.

Jackson, R. B., Lajtha, K., Crow, S. E., Hugelius, G., Kramer, M. G. and Piñeiro, G.: The Ecology of Soil Carbon: Pools, Vulnerabilities, and Biotic and Abiotic Controls, *Annu. Rev. Ecol. Evol. Syst.*, 48(1), 419–445, doi:10.1146/annurev-ecolsys-112414-054234, 2017.





Jastrow, J. D., Amonette, J. E. and Bailey, V. L.: Mechanisms controlling soil carbon turnover and their potential application for enhancing carbon sequestration, *Climatic Change*, 80(1-2), 5–23, doi:10.1007/s10584-006-9178-3, 2006.

Kaiser, M., Ellerbrock, R. H., & Sommer, M. Separation of coarse organic particles from bulk surface soil samples by electrostatic attraction. *Soil Science Society of America Journal*, 73(6), 2118-2130, 2009.

Kaiser, Michael, and Asmeret Asefaw Berhe. "How does sonication affect the mineral and organic constituents of soil aggregates?—A review." *Journal of Plant Nutrition and Soil Science* 177, no. 4: 479-495, 2014

Kaiser, K. and Kalbitz, K.: Cycling downwards - dissolved organic matter in soils, *Soil Biol Biochem*, 52(C), 29–32, doi:10.1016/j.soilbio.2012.04.002, 2012.

Keiluweit, M., Nico, P. S., Kleber, M. and Fendorf, S.: Are oxygen limitations under recognized regulators of organic carbon turnover in upland soils? *Biogeochemistry*, 127(2-3), 157–171, doi:10.1007/s10533-015-0180-6, 2016.

Lawrence, Corey R., Beem-Miller, Jeffery, Hoyt, Alison M., Monroe, Grey, Sierra, Carlos A., Stoner, Shane, Heckman, Katherine, Blankinship, Joseph C., Crow, Susan E., McNicol, Gavin, Trumbore, Susan, Levine, Paul A., Vindušková, Olga, Todd-Brown, Katherine, Rasmussen, Craig, Hick Pries, Caitlin E., Schädel, Christina, McFarlane, Karis, Doetterl, Sebastian, Hatté, Christine, He, Yujie, Treat, Claire, Harden, Jennifer W., Torn, Margaret S., Estop-Aragonés, Cristian, Berhe, Asmeret Asefaw, Keiluweit, Marco, Marin-Spiotta, Erika, Plante, Alain F., Thomson, Aaron, Schimel, Joshua P., Vaughn, Lydia J. S. and Wagai, Rota: International Soil Radiocarbon Database v1.0, Zendo, doi:10.5281/zenodo.2613911, 2019.

Le Quéré, C., Andrew, R. M., Friedlingstein, P., Sitch, S., Hauck, J., Pongratz, J., Pickers, P. A., Korsbakken, J. I., Peters, G. P., Canadell, J. G., Arneeth, A., Arora, V. K., Barbero, L., Bastos, A., Bopp, L., Chevallier, F., Chini, L. P., Ciais, P., Doney, S. C., Gkritzalis, T., Goll, D. S., Harris, I., Haverd, V., Hoffman, F. M., Hoppema, M., Houghton, R. A., Hurtt, G., Ilyina, T., Jain, A. K., Johannessen, T., Jones, C. D., Kato, E., Keeling, R. F., Goldewijk, K. K., Landschützer, P., Lefèvre, N., Lienert, S., Liu, Z., Lombardozi, D., Metzl, N., Munro, D. R., Nabel, J. E. M. S.,



Nakaoka, S.-I., Neill, C., Olsen, A., Ono, T., Patra, P., Peregon, A., Peters, W., Peylin, P., Pfeil, B., Pierrot, D., Poulter, B., Rehder, G., Resplandy, L., Robertson, E., Rocher, M., Rödenbeck, C., Schuster, U., Schwinger, J., Séférian, R., Skjelvan, I., Steinhoff, T., Sutton, A., Tans, P. P., Tian, H., Tilbrook, B., Tubiello, F. N., van der Laan-Luijkx, I. T., van der Werf, G. R., Viovy, N., Walker, A. P., Wiltshire, A. J., Wright, R., Zaehle, S. and Zheng, B.: Global Carbon Budget 2018, *Earth Syst. Sci. Data*, 10(4), 2141–2194, doi:10.5194/essd-10-2141-2018, 2018.

Lehmann, J. and Kleber, M.: The contentious nature of soil organic matter, *Nature*, 1–9, doi:10.1038/nature16069, 2015.

Leinemann, T., Preusser, S., Mikutta, R., Kalbitz, K., Cerli, C., Höschen, C., Mueller, C.W., Kandeler, E., and Guggenberger G.: Multiple exchange processes on mineral surfaces control the transport of dissolved organic matter through soil profiles, *Soil Biology and Biochemistry*, 118, 79-90, 2018.

Manzoni, S., Katul, G. G. & Porporato, A. Analysis of soil carbon transit times and age distributions using network theories. *J. Geophys. Res.* 114, G04025, 2009.

Martel, YA., Paul, EA. Effects of cultivation on organic-matter of grassland soils as determined by fractionation and radiocarbon dating. *Canadian Journal of Soil Science*, 54(4), 419-426, 1974.

Masiello, C., Chadwick, O. A., Southon, J., Torn, M. and Harden, J. W.: Weathering controls on mechanisms of carbon storage in grassland soils, *Global Biogeochem Cy*, 18(4), GB4023, doi:10.1029/2004GB002219, 2004.

Mathieu, J. A., Hatté, C., Balesdent, J. and Parent, É.: Deep soil carbon dynamics are driven more by soil type than by climate: a worldwide meta-analysis of radiocarbon profiles, *Global Change Biol*, 21(11), 4278–4292, doi:10.1111/gcb.13012, 2015.

Moni, Christophe, D. Derrien, P-J. Hatton, Bernd Zeller, and M. Kleber. "Density fractions versus size separates: does physical fractionation isolate functional soil compartments?." *Biogeosciences* 9, 12:5181-5197, 2012.

O'Brien, BJ. Soil organic-carbon fluxes and turnover rates estimated from radiocarbon enrichments. *Soil biology & biochemistry*, 16(2), 115-120, 1984.



Ohno, T., Heckman, K. A., Plante, A. F., Fernandez, I. J. and Parr, T. B.:  $^{14}\text{C}$  mean residence time and its relationship with thermal stability and molecular composition of soil organic matter: A case study of deciduous and coniferous forest types, *Geoderma*, 308, 1–8, doi:10.1016/j.geoderma.2017.08.023, 2017.

Paul, E.A., Morris, S.J., and Böhm, S., The determination of soil C pool sizes and turnover rates: biophysical fractionation and tracers. In: Lal, R. (Ed.), *Assessment Methods for Soil Carbon*. Lewis Publishers, New York, pp. 193–206, 2001.

Plante, A. F., Conant, R. T., Stewart, C. E., Paustian, K. and Six, J.: Impact of soil texture on the distribution of soil organic matter in physical and chemical fractions, *Soil Sci Soc Am J*, 70(1), 287–296, 2006.

Rumpel, C., and I. Kögel-Knabner, Deep soil organic matter—a key but poorly understood component of terrestrial C cycle, *Plant Soil*, 338(1-2), 143–158, doi:10.1007/s11104-010-0391-5. 2010.

Schmidt, M. W. I., Torn, M. S., Abiven, S., Dittmar, T., Guggenberger, G., Janssens, I. A., Kleber, M., Kögel-Knabner, I., Manning, D. A. C., Nannipieri, P., Rasse, D. P., Weiner, S. and Trumbore, S. E.: Persistence of soil organic matter as an ecosystem property, *Nature*, 478(7367), 49–56, doi:10.1038/nature10386, 2011.

Sierra, C., Müller, M. and Trumbore, S. E.: Models of soil organic matter decomposition: the SoilR package, version 1.0., 5(4), 1045–1060, doi:10.5194/gmd-5-1045-2012, 2012.

Sierra, C. A., Müller, M., Metzler, H., Manzoni, S. and Trumbore, S. E.: The muddle of ages, turnover, transit, and residence times in the carbon cycle, *Global Change Biol*, 23(5), 1763–1773, doi:10.1111/gcb.13556, 2017.

Six, J. and Paustian, K.: *Soil Biology & Biochemistry*, *Soil Biol Biochem*, 68(C), A4–A9, doi:10.1016/j.soilbio.2013.06.014, 2014.

Sollins, P., Kramer, M. G., Swanston, C., Lajtha, K., Filley, T., Aufdenkampe, A. K., Wagai, R. and Bowden, R. D.: Sequential density fractionation across soils of contrasting mineralogy:



evidence for both microbial- and mineral-controlled soil organic matter stabilization, *Biogeochemistry*, 96(1-3), 209–231, doi:10.1007/s10533-009-9359-z, 2009.

Sollins, P., Swanston, C., Kleber, M., Filley, T., Kramer, M., Crow, S., Caldwell, B. A., Lajtha, K. and Bowden, R.: Organic C and N stabilization in a forest soil: Evidence from sequential density fractionation, *Soil Biol Biochem*, 38(11), 3313–3324, doi:10.1016/j.soilbio.2006.04.014, 2006.

Sulman, B. N., Moore, J. A. M., Abramoff, R., Averill, C., Kivlin, S., Georgiou, K., Sridhar, B., Hartman, M. D., Wang, G., Wieder, W. R., Bradford, M. A., Mayes, M. A., Morrison, E., Riley, W. J., Salazar, A., Schimel, J. P., Tang, J. and Classen, A. T.: Multiple models and experiments underscore large uncertainty in soil carbon dynamics, *Biogeochemistry*, 141(2), 1–15, doi:10.1007/s10533-018-0509-z, 2018.

Swanston, C.W., M.S. Torn, P.J. Hanson, J.R. Southon, C.T. Garten, E.M. Hanlon, L. Gano. Characterizing processes of soil carbon stabilization using forest stand-level radiocarbon enrichment. *Geoderma* 128:52–62, 2005.

Szymanski, L.M., G.R. Sanford, K. Heckman, R.D. Jackson and E. Marín-Spiotta. Conversion to bioenergy crops alters the amount and age of microbially-respired soil carbon. *Soil Biology and Biochemistry* 128: 35-44, 2019.

Tamm, CO., Ostlund, HG. Radiocarbon dating of soil humus. *Nature*, 185(4714), 706-707, 1960.

Torn, M. S., Vitousek, P. M. and Trumbore, S. E.: The influence of nutrient availability on soil organic matter turnover estimated by incubations and radiocarbon modeling, *Ecosystems*, 8(4), 352–372, doi:10.1007/s10021-004-0259-5, 2005.

Trumbore, S. E.: Age of soil organic matter and soil respiration: Radiocarbon constraints on belowground C dynamics, *Ecol Appl*, 10(2), 399–411, 2000.

Trumbore, S. E.: Carbon respired by terrestrial ecosystems - recent progress and challenges, *Global Change Biol*, 12(2), 141–153, doi:10.1111/j.1365-2486.2005.01067.x, 2006.

Trumbore, S., M. Torn, and L. Smith. Constructing a database of terrestrial radiocarbon measurements, *Eos Trans. AGU*, 92(43), 376, doi:10.1029/2011EO430006. 2011.



Ziegler, S. E., Benner, R., Billings, S. A., Edwards, K. A., Philben, M., Zhu, X. and Laganière, J.:  
Climate Warming Can Accelerate Carbon Fluxes without Changing Soil Carbon Stocks, *Front.  
Earth Sci.*, 5, 535–12, doi:10.3389/feart.2017.00002, 2017.

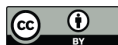

## Tables

**Table 1.** The number of data points currently included at each hierarchical level in ISRaD v1.0.

| Entries | Sites | Profiles | Layers | Fractions | Incubations | Interstitial | Fluxes |
|---------|-------|----------|--------|-----------|-------------|--------------|--------|
| 202     | 530   | 1764     | 7321   | 3717      | 1976        | 353          | 2119   |



**Table 2.** Details of calculations included with ISRaD\_extra to date. Further additions are expected in the future.

| Operation   | Purpose                                                                                                                                                                                                                                       | Output                                                                                                                                                                                                                                                                                                    |
|-------------|-----------------------------------------------------------------------------------------------------------------------------------------------------------------------------------------------------------------------------------------------|-----------------------------------------------------------------------------------------------------------------------------------------------------------------------------------------------------------------------------------------------------------------------------------------------------------|
| fill_dates  | Radiocarbon calculations and unit conversions often require the year of measurement.                                                                                                                                                          | If no date is reported for fraction and/or incubation observation dates, this function replaces those empty cells with the mandatory layer observation date.                                                                                                                                              |
| fill_14c    | In some studies, only fraction modern (FM) units are reported                                                                                                                                                                                 | If no $\Delta^{14}\text{C}$ values are reported, they are calculated from FM and the measurement date.                                                                                                                                                                                                    |
| fill_coords | Spatial coordinates are required to plot soil profiles and to extract geospatial data. Profile level coordinates are often not reported in publications.                                                                                      | If no spatial coordinates are specified for a profile, this function fills those cells with the site coordinates, which are required for template ingestion.                                                                                                                                              |
| delta_delta | Delta-delta ( $\Delta\Delta$ ) is the offset between the $\Delta^{14}\text{C}$ ratio of the atmosphere and that of a sample during the year of collection and is a useful way to compare radiocarbon data across a range of collection years. | This function calculates the $\Delta\Delta$ values for all radiocarbon measurements in the database, using the profile coordinates and the year of observation to extract an atmospheric radiocarbon value for the region of sample collection. The output is appended as a new variable, e.g. lyr_dd14c. |
| fill_FM     | In some studies, only $\Delta^{14}\text{C}$ values are reported.                                                                                                                                                                              | If no FM values reported, they are calculated from $\Delta^{14}\text{C}$ values.                                                                                                                                                                                                                          |
| CStocks     | Measurements of carbon concentration are not, on their own, good estimates of the mass of carbon in soils.                                                                                                                                    | If not measured directly, organic carbon concentration is filled with total carbon concentration (carbonates are accounted for only if reported). Then, with user-supplied bulk density, these values are used to calculate the mass of carbon in each soil layer (i.e., C stocks).                       |
| fill_expert | In some cases, data measured at one extent may be reasonably substituted at another extent for the purposes of conducting comparisons across incomplete datasets                                                                              | Original reported data can be merged with expert suggested data to provide unreported bulk layer values. These estimates are not from original studies, and may be approximations, but they are useful for large-scale global analyses.                                                                   |





|                    |                                                                                                                                                                                                                                     |                                                                                                                                                                                                                                                                                                                                                                                                                                              |
|--------------------|-------------------------------------------------------------------------------------------------------------------------------------------------------------------------------------------------------------------------------------|----------------------------------------------------------------------------------------------------------------------------------------------------------------------------------------------------------------------------------------------------------------------------------------------------------------------------------------------------------------------------------------------------------------------------------------------|
| geospatial.climate | Across a wide range of datasets, basic climate variables are inconsistently measured and reported. The purpose of this function is to fill separate, geospatially-estimated, climate parameters with a consistent source and scale. | This function uses the site coordinates to pull climate, meteorological, soil and other parameters from known global scale source datasets. At present, we use climate data from WorldClim v1.4 ( <a href="http://www.worldclim.org/bioclim">http://www.worldclim.org/bioclim</a> ) and soil classification and characteristics from ISRIC ( <a href="https://www.isric.org/explore/soilgrids">https://www.isric.org/explore/soilgrids</a> ) |
|--------------------|-------------------------------------------------------------------------------------------------------------------------------------------------------------------------------------------------------------------------------------|----------------------------------------------------------------------------------------------------------------------------------------------------------------------------------------------------------------------------------------------------------------------------------------------------------------------------------------------------------------------------------------------------------------------------------------------|



## Figure Captions

**Figure 1.** Conceptual diagram of an entry in the database. Each box represents a table in an entry; the horizontal bars distinguish the hierarchical levels of the database. Arrows show the hierarchical relationship between and among levels of the database. Time is considered at the profile level, as this is the coarsest spatial scale for which observational data are reported. Every time a profile is sampled a unique profile identifier must be generated, consisting of the profile name combined with the profile observation date, which is then linked to all measurements made at or below the profile level of the hierarchy.

**Figure 2.** An entity relationship diagram for the International Soil Radiocarbon Database (ISRaD). A short description of the required variables for each entity are shown along with the field name used in the database and the variable data type. Crow's foot connections with a straight line indicate mandatory daughter entities (one or more), whereas a crow's foot with an open circle indicates optional (zero or more) daughter entities. The "\*" indicates entries indicate keys, or linking variables, which are repeated at each successive level of the ISRaD hierarchy. The "^" indicates conditionally required values. A full list of non-required variables is available in the Template Information File.

**Figure 3.** One key feature of the ISRaD structure is the ability to classify and categorize data generated from diverse methods for fractionating soils. The ISRaD approach requires specification of the fractionation scheme applied, which may include but is not limited to: density (A), aggregate (B), and/or particle size (C) separations. In each of these examples, the fraction data is linked to a specific soil layer. Classification of the fractionation scheme along with several other fields that specify the nature of the fractionation method allow for an accurate partitioning of mass between the individual fractions, such that the total mass of the soil layer can be reconstructed. A proper accounting of mass attributable to each soil fraction, which in some cases may be derived from more complicated multistep or sequential fractionations (D), is essential in order to compare measurements across these diverse methods.

**Figure 4.** Geographic location of sites currently included in ISRaD v1.0. Circles that appear darker in color indicate multiple overlapping sites at the resolution of the map.



**Figure 5.** A simplified depiction of the ISRaD governance pyramid, where the scientific steering committee is responsible for approving major management decisions and data maintainers are responsible for implementing broad changes, but data contributors and users are the primary drivers of the evolution of the data product.

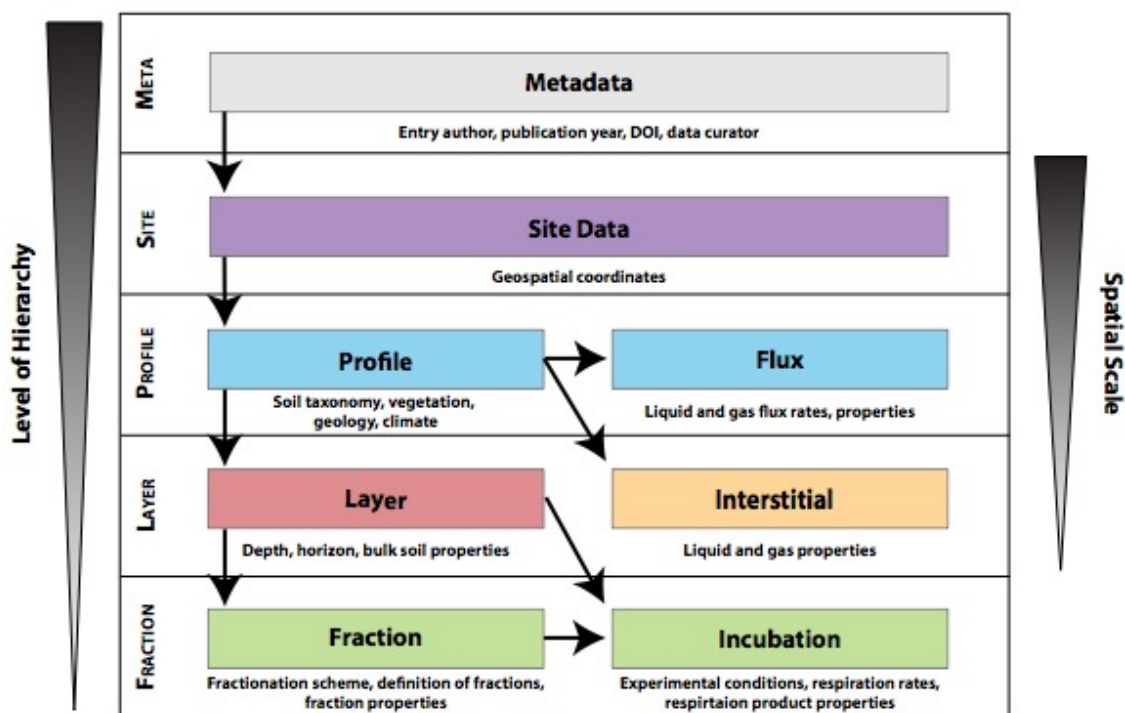

Figure 1.

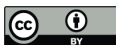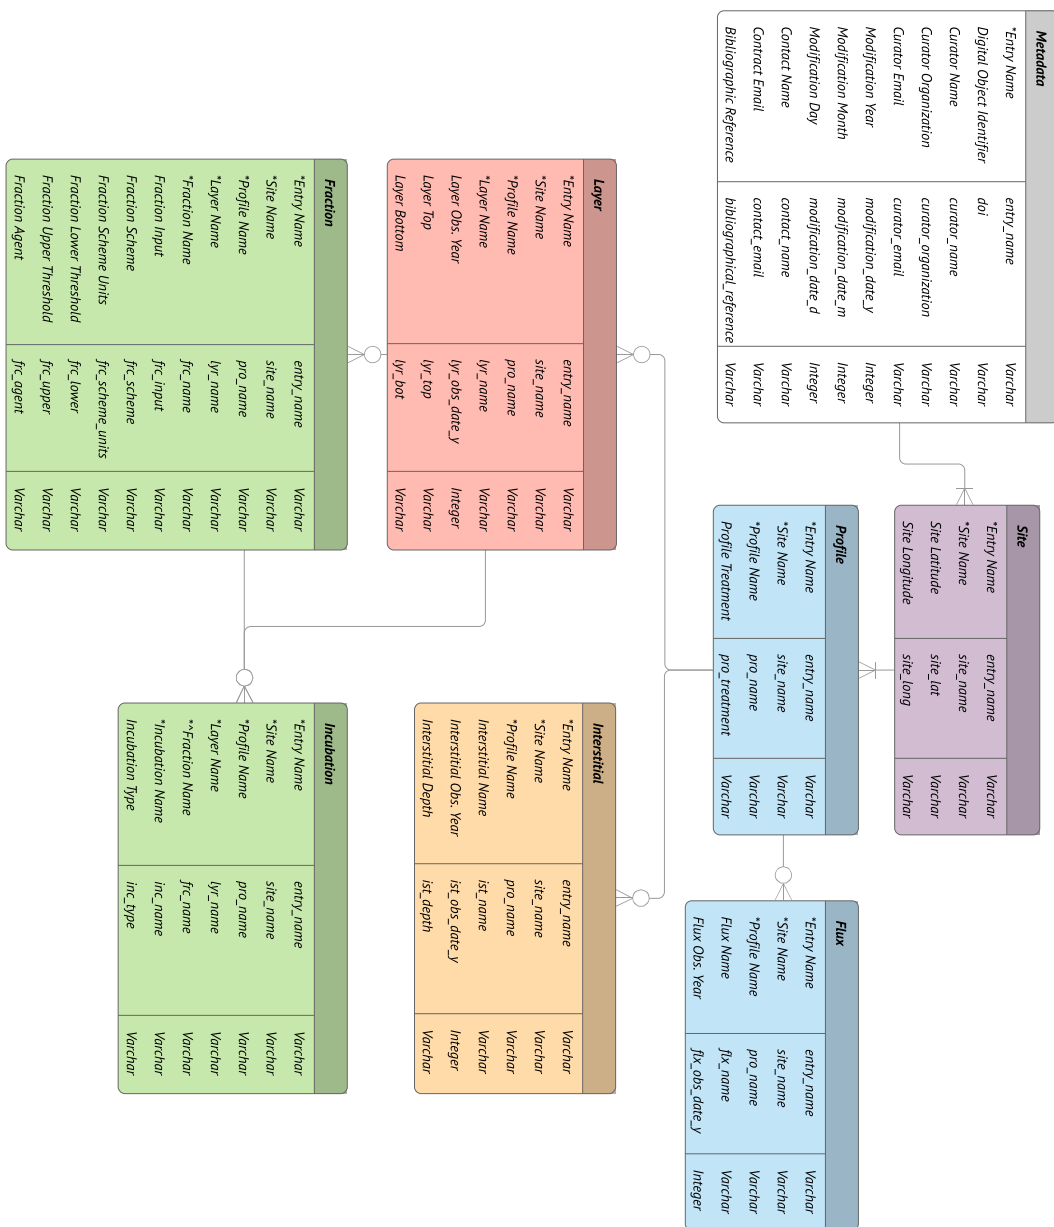

Figure 2.

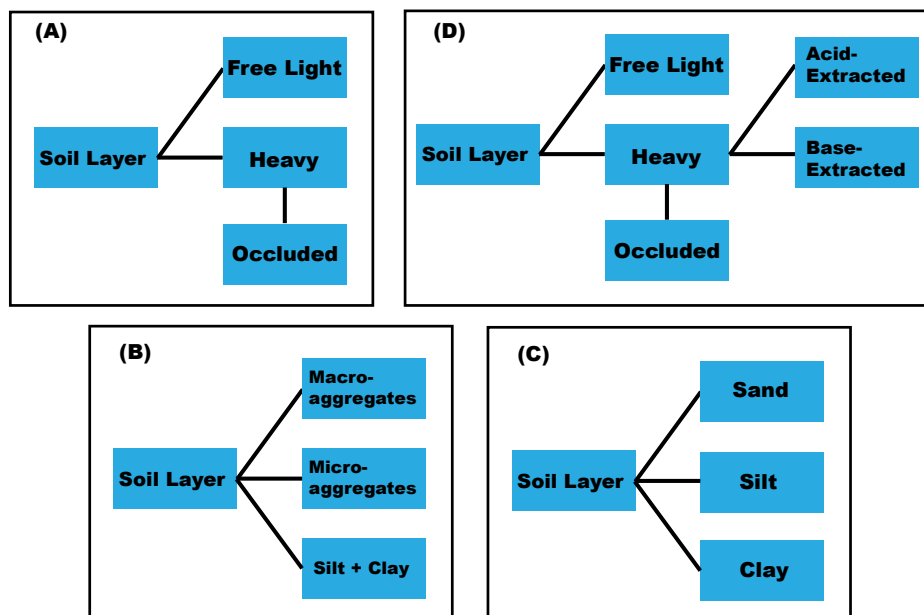

Figure 3.

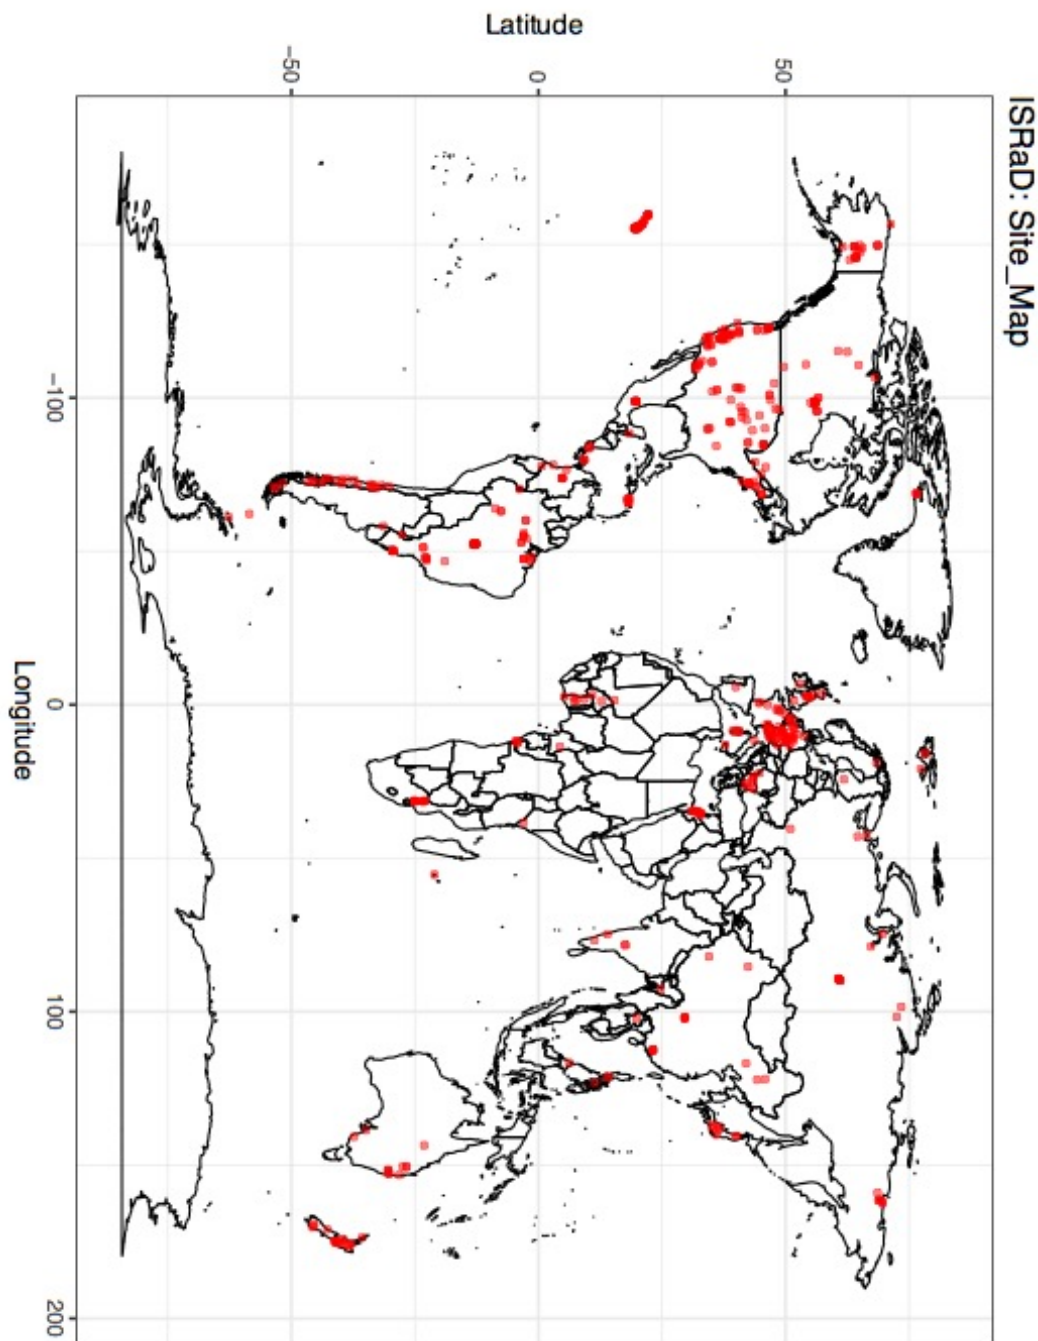

Figure 4.

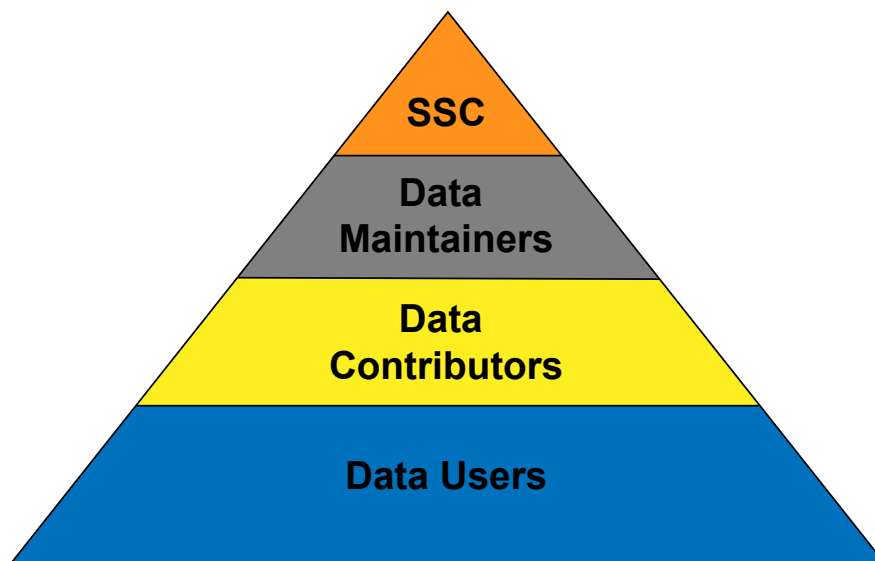

Figure 5.
